# Supplementary material
Source: PubMed Central journal article supplement (PMC4771502)
Supplement: 10-1055-s-0035-1568169-sup_gf985.pdf [file 10-1055-s-0035-1568169-sup_gf985.pdf]

# Statement der AGO Kommission Ovar, AGO Studiengruppe, NOGGO, AGO Österreich und AGO Schweiz zum Einsatz der hyperthermen intraperitonealen Chemotherapie (HIPEC) bei Ovarialkarzinom

Statement of the AGO Kommission Ovar, AGO Study Group, NOGGO, AGO Austria and AGO Switzerland Regarding the Use of Hyperthermic Intraperitoneal Chemotherapy (HIPEC) in Ovarian Cancer

## Autoren

P. Harter<sup>1</sup>, A. du Bois<sup>2</sup>, S. Mahner<sup>1</sup>, J. Pfisterer<sup>2</sup>, O. Ortmann<sup>1</sup>, C. Marth<sup>3</sup>, D. Fink<sup>4</sup>, F. Hilpert<sup>2</sup>, U. Wagner<sup>1</sup>, J. Sehouli<sup>5</sup>

## Institute

<sup>1</sup> Arbeitsgemeinschaft Gynäkologische Onkologie Kommission Ovar

<sup>2</sup> Arbeitsgemeinschaft Gynäkologische Onkologie Studiengruppe

<sup>3</sup> Arbeitsgemeinschaft Gynäkologische Onkologie Österreich

<sup>4</sup> Arbeitsgemeinschaft für Gynäkologische Onkologie und Brustgesundheit, Schweiz

<sup>5</sup> Nord-Ostdeutsche Gesellschaft für Gynäkologische Onkologie

## Schlüsselwörter

- Ovarialkarzinom
- HIPEC
- Empfehlung

## Key words

- ovarian cancer
- HIPEC
- statement

## Zusammenfassung

Bereits in 2013 wurde eine Stellungnahme der AGO Kommission Ovar, die vor dem unkritischen Einsatz der HIPEC außerhalb von kontrollierten Studien gewarnt hat, publiziert. Unter Würdigung der seither erschienenen Literatur wurde diese Stellungnahme nun gemeinsam von der Kommission Ovar, der AGO Studiengruppe, NOGGO, AGO Österreich und AGO Schweiz aktualisiert. Zusammenfassend kommen die Autoren zu dem Ergebnis, dass die HIPEC auch weiterhin als experimentell zu bewerten ist und ein Einsatz außerhalb von prospektiven, kontrollierten Studien nicht zu empfehlen und abzulehnen ist.

## Abstract

The AGO Kommission Ovar already published a statement in 2013, warning about the uncritical use of hyperthermic intraperitoneal chemotherapy (HIPEC) outside controlled studies. This statement has now been updated after the most recent literature was reviewed by AGO Kommission Ovar, the AGO Study Group, NOGGO, AGO Austria and AGO Switzerland. The authors conclude that HIPEC remains experimental. Its use is not recommended and should be rejected outside of prospective controlled trials.

Aufgrund des im klinischen Alltag anhaltenden unkritischen Einsatzes der hyperthermen intraperitonealen Chemotherapie (HIPEC) beim Ovarialkarzinom ist es unserer Kommission ein besonderes Anliegen, die Stellungnahme der Arbeitsgemeinschaft Gynäkologische Onkologie (AGO) aus dem März 2013 zu aktualisieren. In diesem Kontext ist auch zu erwähnen, dass wir gemeinsam mit allen an der Versorgung von Patientinnen mit Ovarialkarzinom beteiligten Disziplinen eine S3-Leitlinie [1] erarbeitet haben, in der ebenso wie in unserem etwas detaillierteren vorherigen Statement die HIPEC-Methode im Konsensus als experimentelles Konzept eingestuft worden ist [2].

Bei der Einführung neuer Behandlungsmethoden in den klinischen Alltag gilt sowohl für neue Medikamente als auch für neue Operationsstrategien die Regel, dass stufenweise und nach den Kriterien der evidenzbasierten Medizin konsekutiv die Prüfung der Zielkriterien Sicherheit, Machbarkeit, Wirksamkeit und Überlegenheit gegenüber dem aktuellen Standard erfolgen muss, bevor sie in den klinischen Alltag implementiert werden kann. Dabei werden in der Onkologie z.B. Neben-

wirkungen, Aspekte der Lebensqualität, das progressionsfreie Überleben und das Gesamtüberleben als wesentliche Zielkriterien definiert. Es ist ausgesprochen ungewöhnlich, die Idee zu propagieren, ein neues Verfahren „einfach so“ und ohne die Sicherheit durch Nachweis eines Vorteils (oder zumindest von Gleichwertigkeit) in einer vergleichenden Studie einzuführen. Teilweise wird dies damit begründet, dass diejenigen, die dieses Verfahren einsetzen, entsprechende Vergleichsstudien nicht machen können bzw. die etablierten Studiengruppen keine entsprechenden Studien durchführen. Hier ist anzumerken, dass international derzeit 8 randomisierte Studien den Einsatz von HIPEC bei Patientinnen mit Ovarialkarzinom untersuchen (NCT 01539785, 02124421, 01628380, 02328716, 00426257, 01539785, 01767675 und 01376752). Es steht somit jeder Gruppierung oder Klinik in Deutschland frei, nach den Regeln der Good Clinical Practice an diesen Studien teilzunehmen. Hierfür notwendige Mittel müssten entweder über die jeweiligen Studienorganisatoren oder über andere Fördermöglichkeiten eingeworben werden. Das Prinzip der öffentlichen Mittelvergabe ist die Überzeu-

eingereicht 1. 10. 2015

revidiert 1. 10. 2015

akzeptiert 5. 10. 2015

## Bibliografie

**DOI** <http://dx.doi.org/10.1055/s-0035-1568169>  
Geburtsh Frauenheilk 2016; 76: 1–3 © Georg Thieme Verlag KG Stuttgart · New York · ISSN 0016-5751

## Korrespondenzadresse

**Dr. Philipp Harter**  
Klinik für Gynäkologie & Gynäkologische Onkologie  
Kliniken-Essen-Mitte  
Henricistraße 92  
45136 Essen  
p.harter@kliniken-essen-mitte.de

gungskraft des Konzepts und die erwartete Relevanz der Ergebnisse – dieser Konkurrenz muss sich jede Studie stellen. Die Erfahrungen mit den beiden letzten prospektiv randomisierten Vergleichsstudien zu operativen Fragestellungen in der Gynäkologischen Onkologie, das LION-Protokoll zur Frage der Lymphonodektomie beim Ovarialkarzinom und die DESKTOP-Studie zur Frage der Wertigkeit einer Rezidivoperation zeigen, dass solche Projekte auch machbar sind. Insofern muss an das HIPEC-Verfahren beim Ovarialkarzinom der gleiche Anspruch gestellt werden wie an jede andere neue Therapiestrategie – die subjektive Überzeugung bzw. das Interesse einzelner kann nicht als hinreichender Grund gelten, Standardtherapien zu verlassen und experimentelle Therapien ohne Prüfung einzuführen.

Als theoretische Grundlage für die intraperitoneale Applikation von Cisplatin für die HIPEC werden verschiedene Studien aufgeführt, die nicht unmittelbar vergleichbar sind und grundlegende Unterschiede zur einmaligen für wenige Stunden applizierten intraoperativen Chemotherapie aufweisen. In den klassischen i. p. Studien wurden u. a. verschiedene Zytostatikaregime, Dosierungen und i. d. R. Therapien als Kombination von intraperitonealen und intravenösen Applikationen und über mehrere Zyklen (meist über 18 Wochen) durchgeführt. Der Vorteil der HIPEC soll die „hohe“ intraoperativ intraperitoneale Dosis sein. Wichtig zu erwähnen ist hier, dass die kurzfristige Dosiserhöhung selbst im Rahmen einer Hochdosistherapie keinen Vorteil sowohl im progressionsfreien als auch im Gesamtüberleben belegen konnte [3]; gleiches gilt für eine Reihe von weiteren Studien, die dosisdichte oder/und Dosis-intensivierte Regime evaluiert hatten. Somit kann die höhere lokale Bioverfügbarkeit der Chemotherapie nicht als Argument ihrer vermeintlichen höheren Wirksamkeit verwendet werden.

Bedauerlicherweise gibt es zwar mehrere Publikationen zur HIPEC beim Ovarialkarzinom, aber nur sehr wenige prospektiv kontrollierte Studien. Meist sind diese monozentrisch und mit sehr heterogenen Patientinnenkollektiven (Primär, Rezidiv) durchgeführt worden; bei verschiedenen Studien kann aufgrund fehlender detaillierter Beschreibung das eingeschlossene Kollektiv nicht adäquat charakterisiert werden. Eine der wenigen Studien, die zumindest den Anspruch einer prospektiven Studie erfüllt, ist aktuell publiziert worden [4]. In diese Studie aus Deutschland wurden 12 Patientinnen eingeschlossen. Insgesamt wird hier mit einem medianen progressionsfreien Intervall (PFI) bis zum Erstrezidiv von 16,7 Monaten und einer Komplettresektionsrate von 58% im Rahmen der Rezidiv-OP, ein prognostisch sehr günstig selektiertes Kollektiv beschrieben. Das berichtete mediane PFS von 13,6 Monaten innerhalb der Studie ist gegenüber den prognostisch günstigen Ausgangskriterien vergleichsweise gering, das mediane Gesamtüberleben wird nicht berichtet. Grad-3-Wundheilungsstörungen werden bei 25% und andere höhergradige Komplikationen bei weiteren 25% berichtet. Somit wird die oben zitierte HIPEC-Publikation von den Autoren auch folgerichtig diskutiert: „This should not inspire an increase in the use of cytoreductive surgery and HIPEC outside of clinical trials. Simple extrapolation of HIPEC from other solid tumors to EOC is inappropriate given the significant differences in tumor biology, prognosis, and available treatment options for patients with EOC. Further randomized trials can determine the efficacy of HIPEC before considering this approach a complementary element of treatment in patients.“

Wenn diese Daten nun mit der aktuellen Literatur anderer kontrollierter Studien verglichen werden, sind u. a. folgende Tatsachen zu konstatieren: in den letzten publizierten Studien zur sys-

temtherapeutischen Behandlung lag das mediane PFS bei Therapie mit Carboplatin/pegyliertem liposomalen Doxorubicin bei 11,3 Monaten (AGO-OVAR 2.9/CALYPSO-Studie [5]) bzw. bei 12,4 Monaten bei der Behandlung mit Carboplatin/Gemcitabin/Bevacizumab (OCEANS-Studie [6]) Beide genannten Studien wurden in einem Patientinnenkollektiv mit weniger günstigen Ausgangskriterien durchgeführt, die zudem nicht (OCEANS) oder in weit geringerem Maße (CALYPSO) zuvor operiert wurden. In der letztgenannten Studie wurden 187 der 976 eingeschlossenen Patientinnen (15%) mit platinresistentem Ovarialkarzinomrezidiv operiert. Diese Subgruppe, obwohl prognostisch etwas ungünstiger, da auch Zweitrezidive aufgenommen worden waren, ist dem Kollektiv der 12 Patientinnen von Zivanovic et al. noch am ehesten vergleichbar. Allerdings lag in der CALYPSO-Studie mit konventioneller Chemotherapie ohne HIPEC das mediane PFS bei allen operierten Patientinnen unabhängig vom Operationserfolg bei 18,2 Monaten, bei Patientinnen ohne radiologisch messbaren Tumor sogar noch darüber [7]. Auch was die Komplikationsraten angeht, erscheinen die Daten in größeren Serien ohne HIPEC geringer. Das mediane PFS lag in einer aktuell publizierten Serie mit 217 Patientinnen zur Rezidiv-OP ohne HIPEC unabhängig vom Resttumor bei 20 Monaten [8] und es wurde eine Komplikationsrate (Grad 3+ nach Clavien-Dindo) von 11,6% berichtet.

Auch wenn ein solcher Vergleich zwischen unterschiedlichen Studien naturgemäß keine definitiven Aussagen zulässt und nur Hypothesen erlaubt, unterstreicht er doch umso mehr, dass weitere prospektive, kontrollierte und insbesondere größere und multizentrisch durchgeführte Studien notwendig sind bzw. die laufenden abgeschlossen werden müssen, bevor eine HIPEC-Therapie als valide Therapieoption im klinischen Alltag angewendet werden kann.

Eine weitere deutsche Publikation mit 90 Patientinnen berichtet ebenfalls Daten zu HIPEC bei rezidiviertem Ovarialkarzinom [9]. Bei erreichter Komplettresektion in Kombination mit HIPEC und nachfolgender Systemtherapie wird ein medianes Überleben von 35 Monaten berichtet. Hier kann als Vergleich erneut die OCEANS-Studie (keine einzige Patientin mit erfolgreicher Operation) zitiert werden; in OCEANS lag das Überleben in beiden Therapiearmen ebenfalls bei 33–35 Monaten, obwohl das mediane Alter in den publizierten Studien zu HIPEC mit etwa 54 Jahren deutlich niedriger als bei den zum Vergleich hinzugezogenen Studien ohne HIPEC lag – und bekannterweise das Alter ein wichtiger Prognosefaktor beim Ovarialkarzinom ist. Bei aller Begrenztheit von Studienvergleichen sollte aber nicht ignoriert werden, dass in anderen operativen Serien ohne HIPEC bei Komplettresektion deutlich höhere Gesamtüberlebensraten von 45 bis 63 Monaten beschrieben werden [7, 10–14].

Unsere Einschätzung der bisherigen Daten zur HIPEC-Therapie wird durch ein systematisches Review in der internationalen Literatur unterstützt. Nach umfassender Analyse der aktuellen Daten kamen die Autoren aus Spanien zu folgenden Schlussfolgerungen: „the recently published retrospective data regarding the use of HIPEC for primary advanced and for recurrent ovarian cancer do not indicate any apparent advantage of this treatment in terms of the survival outcomes in these patients“, und des Weiteren „based on the available information, neither gynecologic oncologists nor oncologic surgeons should offer this therapeutic approach to patients except in the context of a clinical trial as an experimental alternative“ [15].

Im Auftrag des österreichischen Gesundheitsministeriums erfolgte aktuell eine Prüfung, ob die HIPEC bei Kolon-, Magen- oder

Ovarialkarzinom in den Leistungskatalog der Krankenkassen integriert werden sollte [16]. Nach einer umfangreichen Analyse kommen die Autoren zu folgender Empfehlung für alle 3 Tumor-entitäten: „Die Aufnahme der CRS + HIPEC in den Leistungskatalog wird derzeit nicht empfohlen. Eine neuerliche Evaluierung wird 2016 vorgeschlagen, wenn die Ergebnisse der derzeit registrierten Phase III Studien voraussichtlich vorliegen.“

Wie oben angeführt, gibt es derzeit 8 registrierte randomisierte Studien weltweit. Solche ausreichend großen und prospektiv vergleichenden Studien sind explizit zu begrüßen. Bedauerlicherweise gibt es nach Kenntnis der Autoren dieser Stellungnahme nur eine einzige Klinik in Deutschland, die sich an einer der o.g. Studien beteiligt. Die Ergebnisse dieser Studien sollten uns helfen, die Rolle der HIPEC besser zu verstehen und sie entweder in das Armamentarium der Therapien des Ovarialkarzinoms zu integrieren oder sie wieder ad acta zu legen.

Zusammenfassend kommen die Autoren nach Analyse der neuesten Literatur zu dem Ergebnis, dass die HIPEC auch weiterhin als experimentell zu bewerten ist und ein Einsatz außerhalb von prospektiven, kontrollierten Studien nicht zu empfehlen und abzulehnen ist.

### Interessenkonflikt

▼  
Nein.

### Literatur

- 1 Wagner U, Harter P, Hilpert F et al. S3-Guideline on diagnostics, therapy and follow-up of malignant ovarian tumors. *Geburtsh Frauenheilk* 2013; 73: 874–889
- 2 Harter P, Mahner S, Hilpert F et al. Statement by the Kommission OVAR of the AGO Study Group on the use of HIPEC (Hyperthermic Intraperitoneal Chemotherapy) to treat primary and recurrent ovarian cancer. *Geburtsh Frauenheilk* 2013; 73: 221–223
- 3 Möbus V, Wandt H, Frickhofen N et al. Phase III trial of high-dose sequential chemotherapy with peripheral blood stem cell support compared with standard dose chemotherapy for first-line treatment of advanced ovarian cancer: intergroup trial of the AGO-Ovar/AIO and EBMT. *J Clin Oncol* 2007; 25: 4187–4193
- 4 Zivanovic O, Abramian A, Kullmann M et al. HIPEC ROC I: A phase I study of cisplatin administered as hyperthermic intraoperative intraperitoneal chemoperfusion followed by postoperative intravenous platinum-based chemotherapy in patients with platinum-sensitive recurrent epithelial ovarian cancer. *Int J Cancer* 2014; 136: 699–708
- 5 Pujade-Lauraine E, Wagner U, Aavall-Lundqvist E et al. Pegylated liposomal doxorubicin and carboplatin compared with paclitaxel and carboplatin for patients with platinum-sensitive ovarian cancer in late relapse. *J Clin Oncol* 2010; 28: 3323–3329
- 6 Aghajanian C, Blank SV, Goff BA et al. OCEANS: a randomized, double-blind, placebo-controlled phase III trial of chemotherapy with or without bevacizumab in patients with platinum-sensitive recurrent epithelial ovarian, primary peritoneal, or Fallopian tube cancer. *J Clin Oncol* 2012; 30: 2039–2045
- 7 Lee CK, Lord S, Grunewald T et al. Impact of secondary cytoreductive surgery on survival in patients with platinum sensitive recurrent ovarian cancer: Analysis of the CALYPSO trial. *Gynecol Oncol* 2015; 136: 18–24
- 8 Harter P, Beutel B, Alesina PF et al. Prognostic and predictive value of the Arbeitsgemeinschaft Gynaekologische Onkologie (AGO) score in surgery for recurrent ovarian cancer. *Gynecol Oncol* 2014; 132: 537–541
- 9 Konigsrainer I, Horvath P, Struller F et al. Cytoreductive surgery and hyperthermic intraperitoneal chemotherapy in recurrent epithelial ovarian cancer with peritoneal metastases: a single centre experience. *Langenbecks Arch Surg* 2014; 399: 589–594
- 10 Chi DS, McCaughy K, Diaz JP et al. Guidelines and selection criteria for secondary cytoreductive surgery in patients with recurrent, platinum-sensitive epithelial ovarian carcinoma. *Cancer* 2006; 106: 1933–1939
- 11 Sehouli J, Richter R, Braicu EI et al. Role of secondary cytoreductive surgery in ovarian cancer relapse: who will benefit? A systematic analysis of 240 consecutive patients. *J Surg Oncol* 2010; 102: 656–662
- 12 Harter P, du Bois A, Hahmann M et al. Surgery in recurrent ovarian cancer: the Arbeitsgemeinschaft Gynaekologische Onkologie (AGO) DESKTOP OVAR trial. *Ann Surg Oncol* 2006; 13: 1702–1710
- 13 Oksefjell H, Sandstad B, Tropé C. The role of secondary cytoreduction in the management of the first relapse in epithelial ovarian cancer. *Ann Oncol* 2009; 20: 286–293
- 14 Tian WJ, Jiang R, Cheng X et al. Surgery in recurrent epithelial ovarian cancer: benefits on survival for patients with residual disease of 0.1–1 cm after secondary cytoreduction. *J Surg Oncol* 2010; 101: 244–250
- 15 Chiva LM, Gonzalez-Martin A. A critical appraisal of hyperthermic intraperitoneal chemotherapy (HIPEC) in the treatment of advanced and recurrent ovarian cancer. *Gynecol Oncol* 2015; 136: 130–135
- 16 Kisser A., Kirisits A. Hypertherme intraperitoneale Chemotherapie bei Peritonealkarzinose solider abdominalen Tumore. *Decision Support Dokument Nr. 74*. Wien: Ludwig Boltzmann Institut für Health Technology Assessment; 2013
